# Supplementary figures and images for: FMRP as a Key Regulator of Stress Granule Dynamics in Cholangiocarcinoma and Melanoma Cells
Source: Research Square preprint supplement (doi:10.21203/rs.3.rs-7428401/v1), 2025-09-09

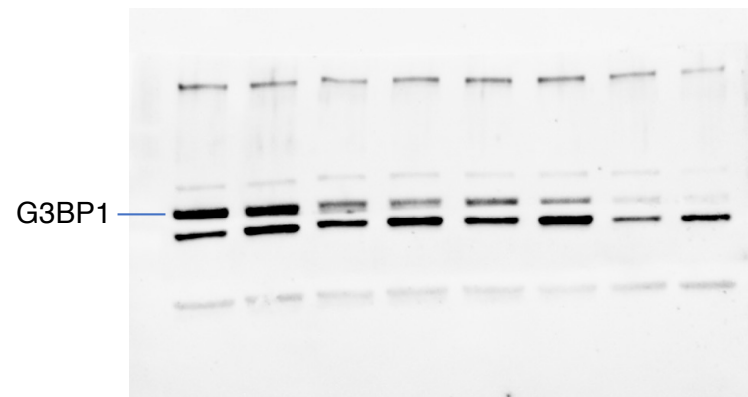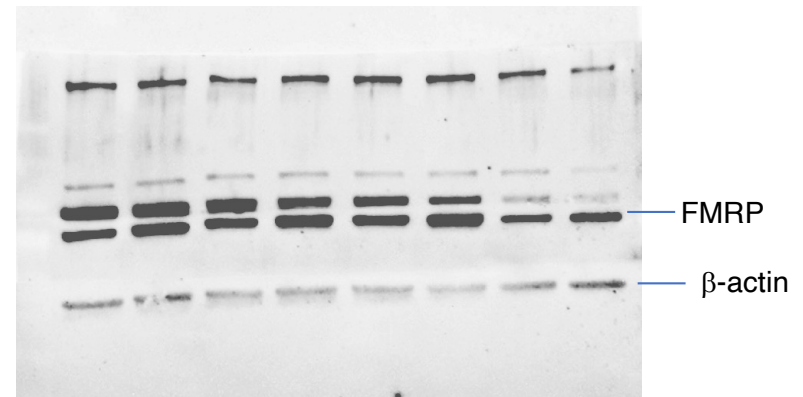

**Figure 2**

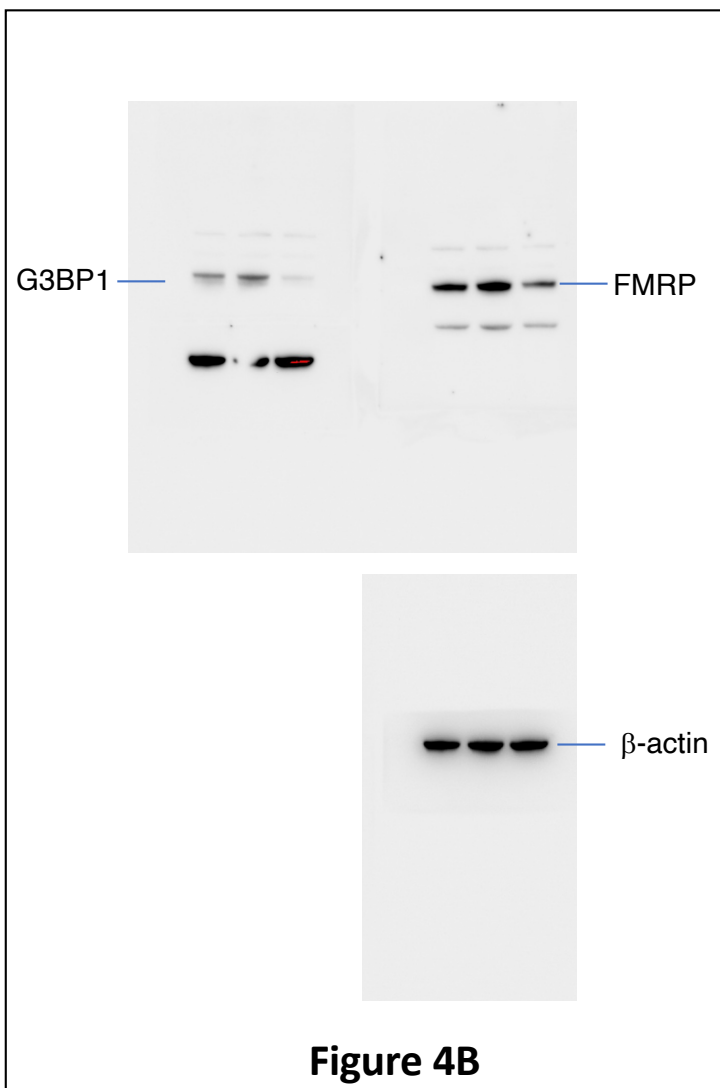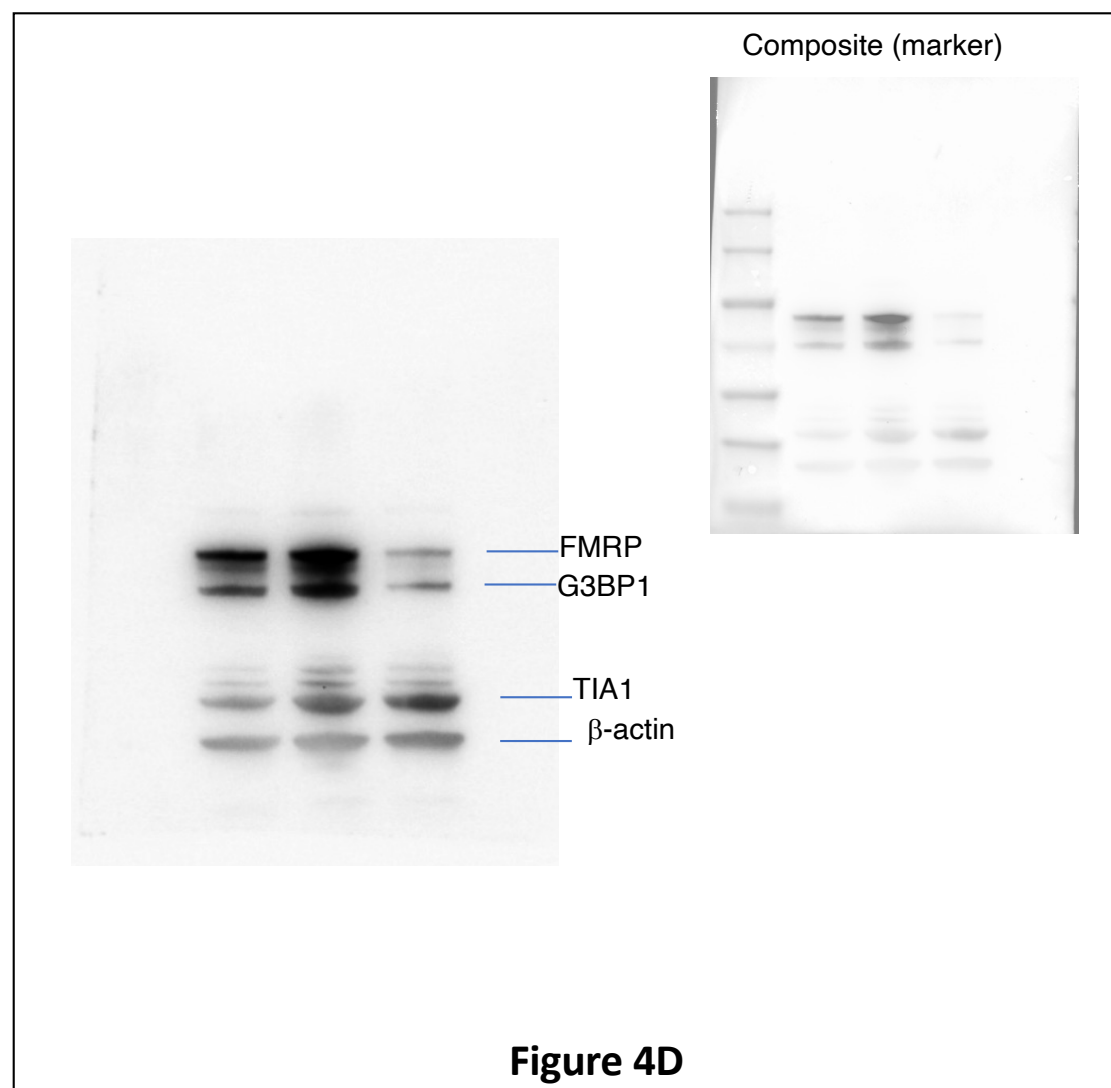

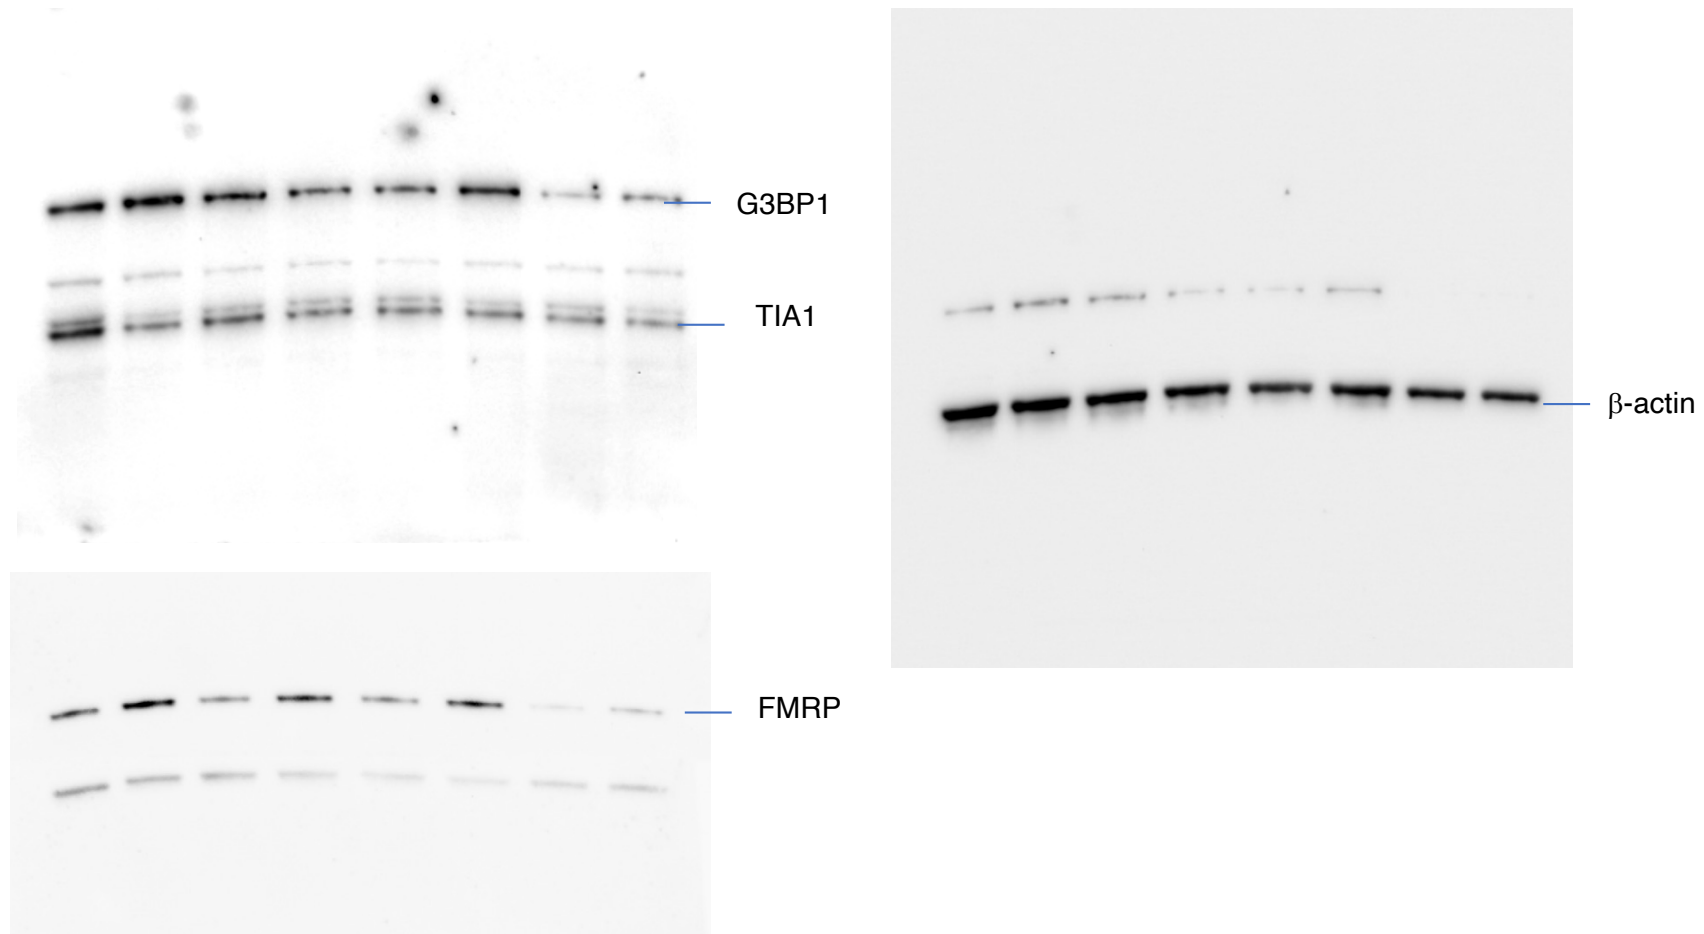

**Figure 4C**

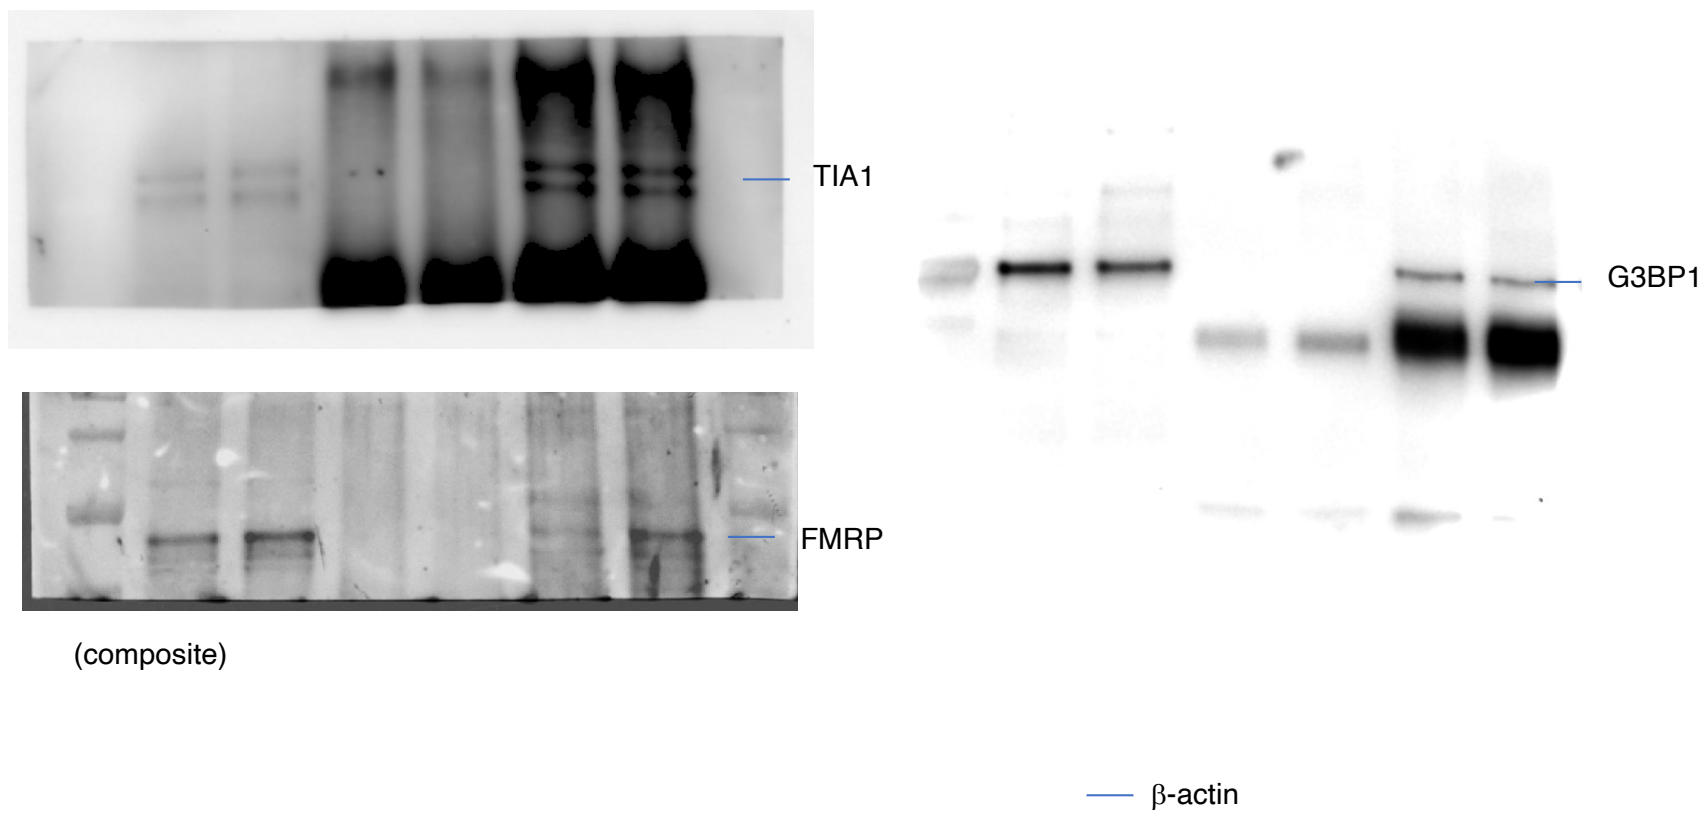

**Figure 6**

Supplement: Supplementary file 1 [file 49939a90d88700de3f268454.pdf]
